# Supplementary material for: Lipidomics and Comparative Metabolite Excretion Analysis of Methanogenic Archaea Reveal Organism-Specific Adaptations to Varying Temperatures and Substrate Concentrations
Source: PubMed Central journal article supplement (PMC10134847; doi:10.1128/msystems.01159-22), 2023-03-07
Supplement: msystems.01159-22-s0001.pdf [file msystems.01159-22-s0001.pdf]

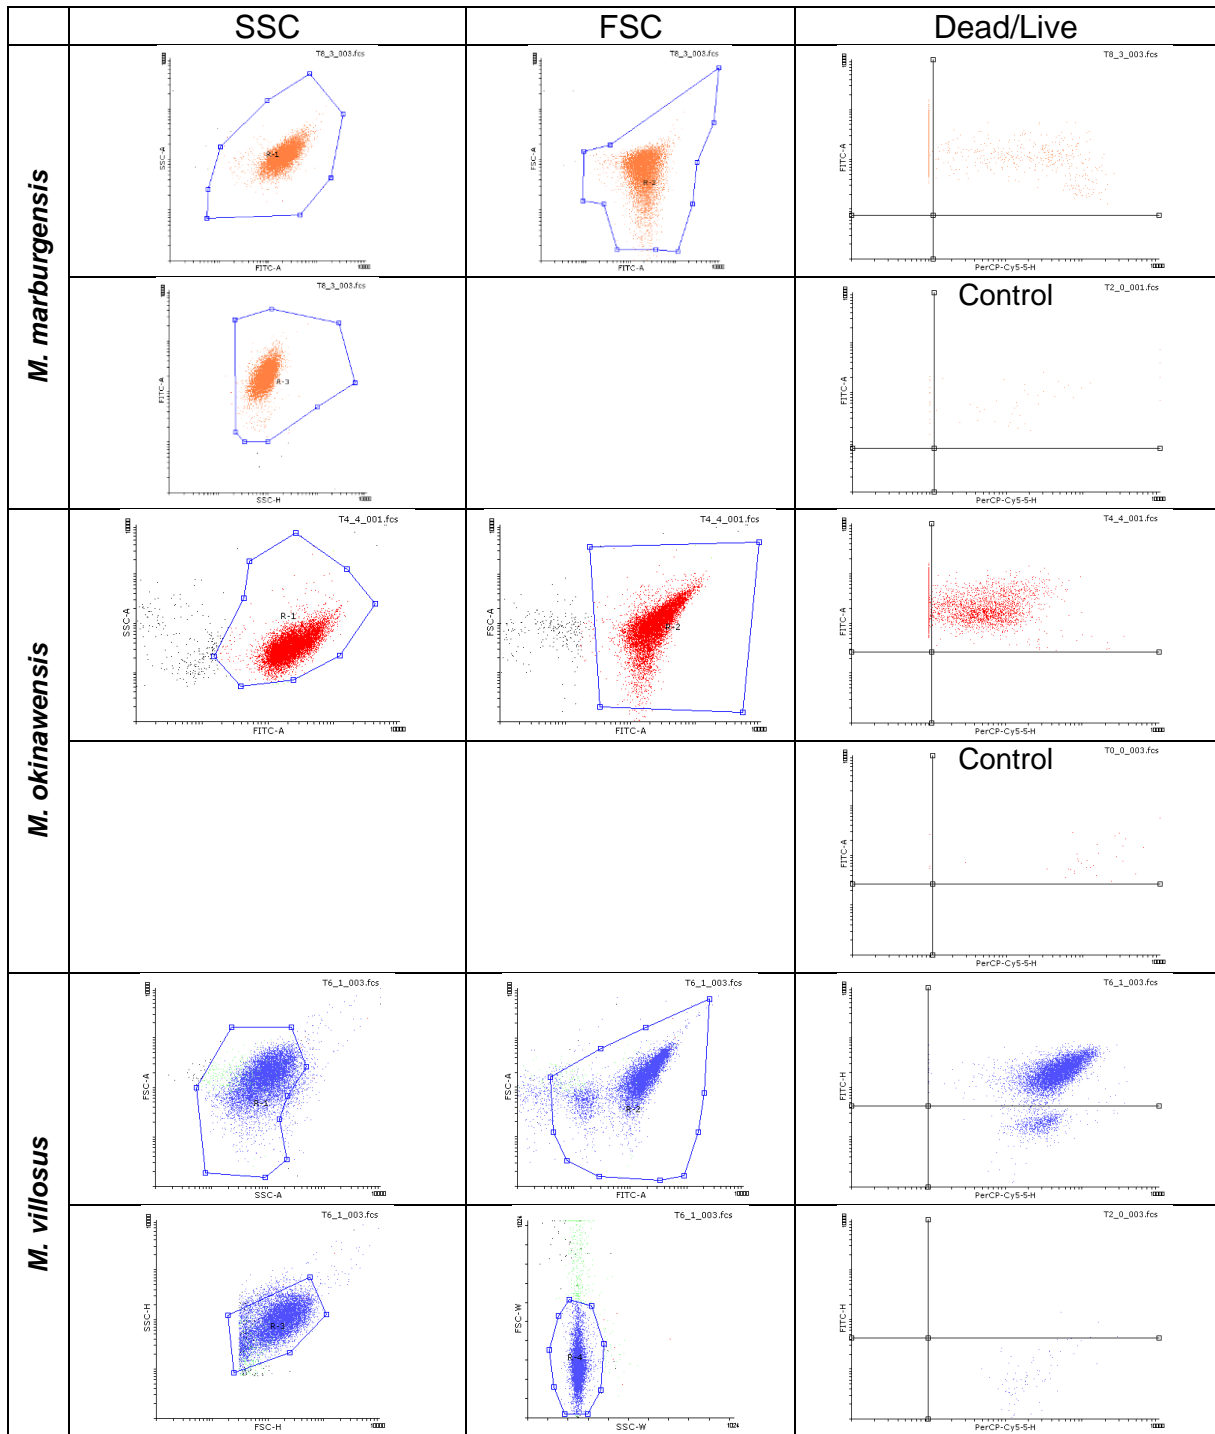

Figure S1, page 1/1
